# Supplementary material
Source: Springer Nature journal article supplement (https://www.springerprofessional.de/resource/supplementary/13638_2012_544_MOESM8_ESM.pdf/11898030)

Frequency response of IIR Filter  $a=0$ ,  $q=0.5$ 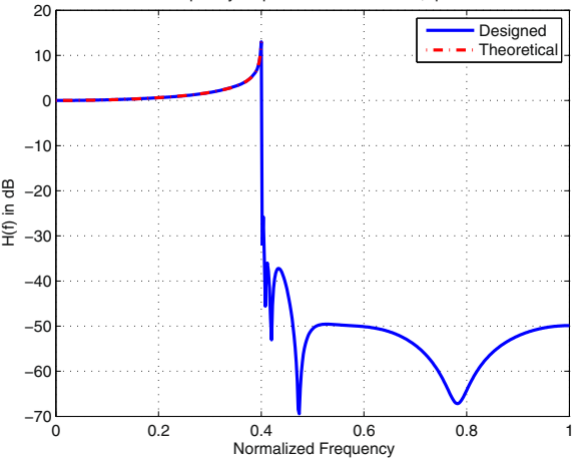

Supplement: MOESM8 [file 11898030]
